# Supplementary material for: Chromosome painting in cultivated banana and their wild relatives (Musa spp.) reveals differences in chromosome structure
Source: bioRxiv or medRxiv preprint supplement (doi:10.1101/2020.08.01.232207), 2020-08-04

## Supplementary Figure S2.

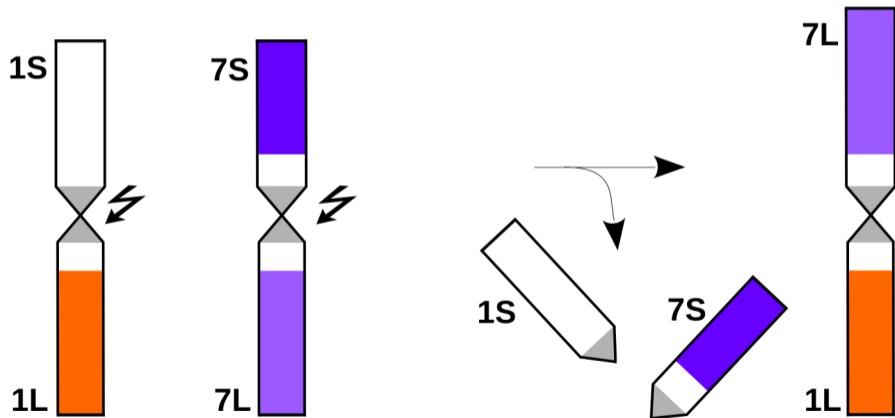

Supplement: Supplementary file [file media-2.pdf]
